# Supplementary material
Source: PubMed Central journal article supplement (PMC2442402)
Supplement: NIHMS49089-supplement-x.pdf [file NIHMS49089-supplement-x.pdf]

# New Mithramycin Analogs Generated by Combinatorial Biosynthesis Show Improved Bioactivity

*Irfan Baig,<sup>1</sup> María Perez,<sup>2</sup> Alfredo F. Braña,<sup>‡</sup> Rohini Gomathinayagam,<sup>&</sup> Chendil  
Damodaran,<sup>&</sup> Jose A. Salas,<sup>‡</sup> Carmen Méndez,<sup>‡\*</sup> and Jürgen Rohr<sup>†\*</sup>*

<sup>†</sup> Department of Pharmaceutical Sciences, College of Pharmacy, University of Kentucky,  
725 Rose Street, Lexington, KY 40536-0082; <sup>‡</sup> Departamento de Biología Funcional e  
Instituto Universitario de Oncología del Principado de Asturias (I.U.O.P.A.), Universidad  
de Oviedo 33006, Spain; <sup>&</sup> Department of Clinical Sciences, College of Health Sciences,  
University of Kentucky, 900 South Limestone Street, Lexington, KY 40536

## Supporting Information

---

<sup>1</sup> University of Kentucky, Department of Pharmaceutical Sciences

<sup>2</sup> Universidad de Oviedo

<sup>&</sup> University of Kentucky, Department of Clinical Sciences

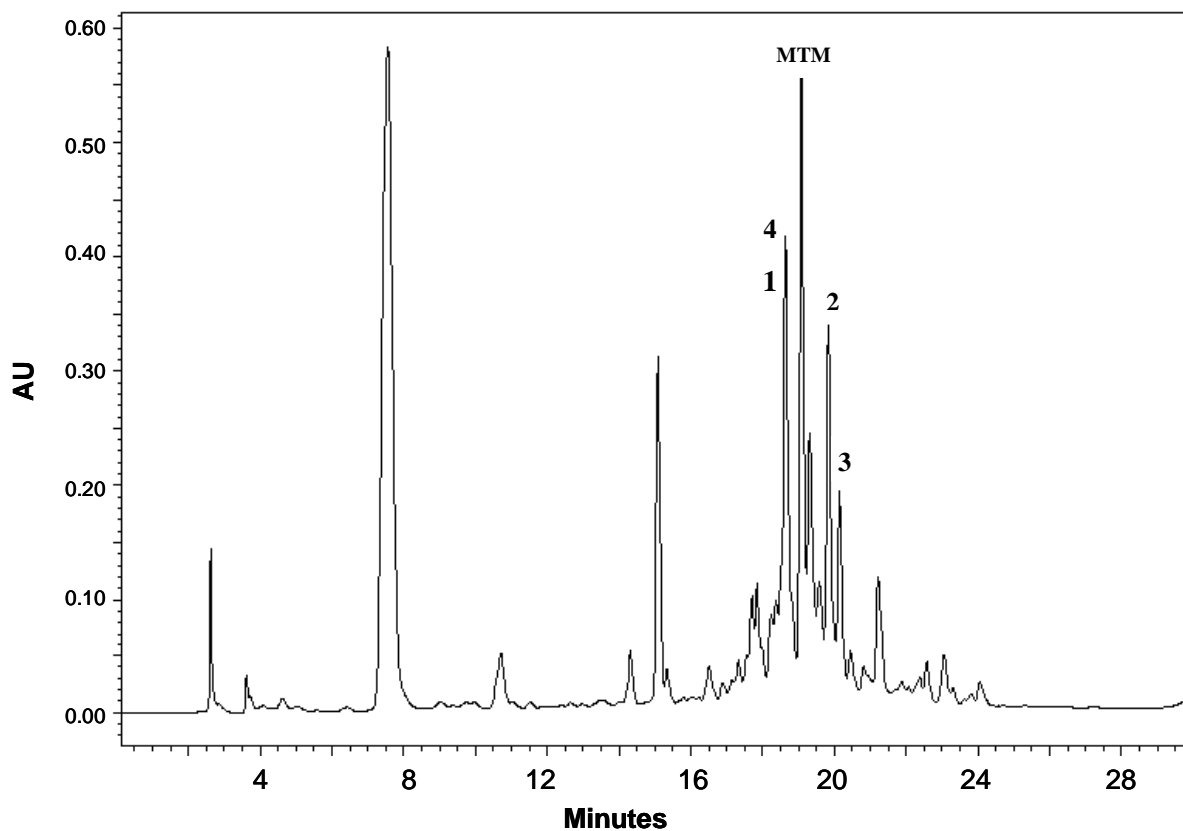

**Figure 1 (Supporting Information):**

HPLC-diagram of EtOAc extracts of cultures of *S. argillaceus* (pLNBIIV). Demycarosyl-3D- $\beta$ -D-digitoxosyl-MTM (**1**); deoliosyl-3C- $\alpha$ -L-digitoxosyl-MTM (**2**); deoliosyl-3C- $\beta$ -D-mycarosyl-MTM (**3**); 3A-deolivosyl-MTM (**4**); mithramycin (**MTM**)
